Title: Countries' geographic latitude and their human populations' cholesterol and blood pressure

Short title: Latitude, cholesterol, and blood pressure

Yuhao Liu, BS<sup>1</sup>; Robert D. Brook, MD<sup>2</sup>; Xuefeng Liu, PhD<sup>3</sup>; and James Brian Byrd, MD, MS<sup>4</sup>

<sup>1</sup>Department of Statistics, University of Michigan, 311 West Hall, 1085 South University, Ann Arbor, MI 48109-1107

<sup>2</sup>Department of Medicine, University of Michigan Medical School, Domino's Lobby A Ste 3700 #3231D, Ann Arbor MI 48105-5363

<sup>3</sup>Department of Systems, Populations and Leadership, University of Michigan School of Nursing, 426 N Ingalls St, Ann Arbor, MI 48104

<sup>4</sup>Department of Medicine, University of Michigan Medical School, 5570C MSRB II, 1150 W Medical Center Dr, Ann Arbor, MI 48109

To Whom Correspondence Should be Addressed:

James Brian Byrd, MD, MS, University of Michigan, 5570C MSRB II, Ann Arbor, MI 48109

Tel: (734) 998-7991, Email: [jbyrd@med.umich.edu](mailto:jbyrd@med.umich.edu)

Major Category: Biological Sciences

Minor Category: Medical Sciences

# Abstract

**Background** In the 1980s, analysis of 30 countries suggested that people living farther from the Equator had a higher incidence of cardiovascular disease. Some have hypothesized that sunlight plays a role. **Methods** We analyzed 180 or more countries' age-standardized average cholesterol, age-standardized mean systolic blood pressure (BP), and age-standardized prevalence of raised BP, by geographic latitude, over decades. In addition to latitude, we performed analysis by ultraviolet B light (UVB) exposure averaged over several years. **Results** Mean cholesterol increases with the distance of a country from the Equator. This relationship has changed very little since 1980. Similarly, in 1975, mean systolic BP and prevalence of raised BP were higher in countries farther from the Equator. However, the relationship between latitude and BP has changed dramatically; by 2015, the opposite pattern was observed in women. Countries' average UVB exposure has a stable relationship with cholesterol over recent decades, but has a changing relationship with BP. **Conclusions** Since sunlight exposure in a country is relatively fixed and its relationship with BP has changed dramatically in recent decades, countries' average sunlight exposure is an unlikely explanation for contemporary country-level variation in BP. However, our findings are consistent with a putative effect of sunlight on countries' average cholesterol, as well as a no longer detectable effect on BP decades ago. A parsimonious potential explanation for the relationship between light and cholesterol is that 7-dehydrocholesterol can be converted to cholesterol, or in the presence of ultraviolet light, it can instead be converted to vitamin D.

## Significance Statement

This study provides a comprehensive analysis of geographic latitude and cardiovascular risk factors. The results show a stable latitude-cholesterol relationship and a changing latitude-blood pressure relationship over recent decades. The findings shed light on whether contemporary differences between countries' average blood pressure are attributable to a previously hypothesized effect of sunlight—it is unlikely. However, the results are consistent with an effect of sunlight on blood pressure several decades ago, and on cholesterol—including in recent years.

Taken together with prior ecological studies, animal studies, and clinical trials, our analysis suggests a role for sunlight in determining countries' average cholesterol. These findings shed new light on the influence of geography on population health and suggest new avenues of investigation.

# Introduction

In the 1980s, the incidence of cardiovascular disease was noted to be higher in countries farther from the Equator.(1) A popular hypothesis is that sunlight exerts a protective effect by reducing cholesterol and/or blood pressure.(2-4) A classic study in rabbits(5) and a more recent study in mice,(6) a cross-sectional study of humans,(7) and a small clinical trial(4) provide evidence of an effect of ultraviolet radiation on cholesterol. A parsimonious potential explanation is that 7-dehydrocholesterol can be converted to cholesterol, or in the presence of ultraviolet light, it can instead be converted to vitamin D.(4, 6) Sunlight's effect on blood pressure is hypothesized to have a more complex biological basis, which might involve vitamin D, nitric oxide, and melanin.(8) There is experimental evidence to support an effect of ultraviolet B light on blood pressure.(9) Sunlight might also change cardiovascular risk factors by influencing countries' agriculture, for example the availability of fresh fruits and vegetables. Whether effects of sunlight on cholesterol or blood pressure manifest at the level of global health is not well understood since most ecological studies relating sunlight exposure and/or latitude to cardiovascular risk factors are old and cross-sectional and involve relatively few countries.

New treatments for elevated cholesterol and blood pressure have been developed and disseminated since the 1970s, even as changes in health habits have swept the globe. It is possible that the relationship between latitude and cholesterol or blood pressure has changed accordingly, suggesting that sunlight is at most a small factor compared to other aspects of lifestyle. If instead, latitude or ultraviolet radiation has an unchanged relationship with a cardiovascular risk factor over decades despite lifestyle changes, a role for sunlight is more likely. Using decades of longitudinal data from over 180 countries, we examined the relationship between latitude and total cholesterol, and systolic blood pressure, with attention to changes over time. We also examined the relationship between ultraviolet B light exposure and countries'

cholesterol or blood pressure. In addition, we examined whether sex differences exist in these relationships.

## Results

Latitude-based analyses included 188 countries' mean cholesterol values, 180 countries' mean systolic blood pressures, and 189 countries' prevalences of raised blood pressure. Ultraviolet B radiation exposure-based analyses included 185 countries' mean cholesterol values and 186 countries' raised blood pressure prevalences.

Since at least the 1980s, average total cholesterol has been lowest in women (**Figure 1A**) and men (**Figure 1B**) living in countries at or near the Equator and has increased symmetrically with distance north or south of the Equator. Despite a downward shift in countries' average cholesterol over recent decades, this symmetry around the Equator has been preserved.

Absolute distance of a country from the Equator has correlated with total cholesterol in women (**Figure 1C**) and men (**Figure 1D**) since at least the 1980s ( $r_s = 0.66$ ,  $P < 2.2e^{-16}$  [females];  $r_s = 0.67$ ,  $P < 2.2e^{-16}$  [males] in 1980;  $r_s = 0.51$ ,  $P = 1.2e^{-13}$  [females];  $r_s = 0.57$ ,  $P < 2.2e^{-16}$  [males] in 2009).

In 1975, countries' mean systolic blood pressure followed a pattern similar to mean cholesterol, with systolic blood pressure increasing with distance north or south of the Equator in females (**Figure 2A**) and to a lesser extent in males (**Figure 2B**). As with cholesterol, countries' mean systolic blood pressure exhibited symmetry north and south of the Equator. In contrast to cholesterol, mean systolic blood pressure's relationship with latitude has been unstable over time. In fact, by 2015, the pattern had reversed itself in females (**Figure 2A**). In males, countries' mean systolic blood pressure had a complex, bimodal relationship with latitude in 2015 (**Figure 2B**). Particularly in females, the changes in latitude's relationship with age-standardized mean systolic blood pressure have been similar in the Northern and Southern

hemispheres, preserving the north-south symmetry seen in the 1970s, with the Equator appearing as an inflection point. The slope of the relationship between absolute distance from the Equator and mean systolic blood pressure has been decreasing over time in females (**Figure 2C**)--in whom it has reversed direction in recent years to a negative relationship--and in males (**Figure 2D**,  $r_s = 0.52$ ,  $P=4.0e^{-14}$  [females];  $r_s = 0.49$ ,  $P=2.9e^{-12}$  [males] in 1975;  $r_s = -0.28$ ,  $P=0.0002$  [females];  $r_s = 0.07$ ,  $P=0.32$  [males] in 2015). Compared to mean systolic blood pressure, countries' prevalences of raised blood pressure had similar LOESS plots (**Figures 3A and 3B**), but stronger symmetry around the Equator and marginally stronger correlation in the 1970s ( $r_s = 0.57$ ,  $P<2.2e^{-16}$  [females];  $r_s = 0.60$ ,  $P<2.2e^{-16}$  [males] in 1975;  $r_s = -0.29$ ,  $P=4.9e^{-5}$  [females],  $r_s = 0.13$ ,  $P=0.09$  [males] in 2015, **Figure 3**).

The relationship between ultraviolet B radiation and cholesterol or blood pressure mirrored their relationships with latitude. For decades, countries with higher average ultraviolet B radiation levels have had lower mean cholesterol in females (**Figure 4A**) and males (**Figure 4B**). As with latitude, the relationship between ultraviolet B radiation and raised blood pressure has been changing over time, with clear reversal of this relationship in females in 2015 compared to 1975 (**Figure 4C**) and dramatic changes in males (**Figure 4D**).

## Discussion

The major new findings of this study are that for at least four decades, males' and females' average cholesterol levels have been higher in countries farther from the Equator, whereas mean systolic blood pressure and the prevalences of raised blood pressure showed a similar pattern decades ago, but no longer. In women, blood pressure's relationship with latitude has reversed over time. Countries' average ultraviolet B radiation has had a relatively constant relationship for decades with their populations' mean cholesterol. The relationship between countries' average ultraviolet B radiation exposure and blood pressure has changed dramatically over time.

In a small study (n=338) conducted at three sites in British Columbia, plasma cholesterol decreased with increasing latitude, a finding the authors attributed to differences in Rhesus Blood Group system.(10) Conversely, hypertension prevalence or blood pressure have been reported to increase with distance north or south of the Equator or with increased solar radiation exposure within single countries(11, 12) and in studies of smaller groups of countries(3, 13) than we have analyzed. However, adjusting for vitamin D levels had no effect on the solar radiation-blood pressure relationship in a recent study, suggesting blood pressure's variation by solar radiation levels is not mediated by vitamin D.(12) Public availability of high-quality data facilitated our more comprehensive analysis of latitude's and ultraviolet B radiation's relationship with males' and females' cardiovascular risk factors estimated at the national level, around the globe and over decades. The focus of our study was to understand the relationship between latitude and cholesterol or blood pressure at the whole-globe level. Our findings contrast with the prior single-country analysis of latitude and cholesterol, suggesting a possible Simpson's paradox, in which findings at a smaller scale of analysis are at odds with findings at a larger scale of analysis. Countries' unique social history might explain such a paradox. Our latitude-blood pressure findings using data from decades ago are consistent with results from decades ago, but since then, the relationship not only has changed in men, it has reversed in women.

The factors explaining the stable relationship between countries' latitude and their populations' cholesterol are likely different from those explaining the relationship between latitude and blood pressure, which has changed dramatically over time. Exposure to sunlight has been proposed to explain the relationship between latitude and blood pressure,(8) but the marked changes in the relationship indicate it is no longer a key determinant of country-level differences in blood pressure, if it once was. Increased sunlight lowers cholesterol in experimental settings in rabbits and humans.(4, 5) Sunlight exposure could plausibly explain or contribute to the more stable relationship between latitude and cholesterol. An indirect effect of sunlight on cardiovascular risk

factors through differences in agriculture is an alternate, plausible explanation of the relationship between UV light and cholesterol. There are likely other plausible explanations, as well. For example, countries' gross domestic product varies by latitude. Interestingly, these differences in economic productivity might also be related to climate,(14) and thus related to sunlight.

Strengths of the current study include longitudinal analysis of high-quality data from more than 180 countries and the bringing together of multiple publicly available datasets to throw new light on an old question. The study is truly global in scale. The principal limitation of the study is directly related to this strength: ecological studies can show us what is true around the globe, but they permit only relatively weak inferences about how to explain what is seen. A second limitation is that our analysis compared countries' UVB light exposure averaged between 1997-2003 to risk factors collected over a broader time span. Our analysis assumes stability of UVB light exposure, whereas there have been some regional changes in UVB light exposure due to the hole in the ozone layer. This issue affects only the UVB light analyses.

Ischemic heart disease (IHD) is the leading cause of death globally. A long-term 10% reduction in total cholesterol lowers risk of ischemic heart disease by 50% at age 40 and 20% at age 70,(15) and a 20 mm Hg lower usual systolic blood pressure is associated with a 50% decrease in death from IHD and 50% decrease in death from stroke.(16) As we seek new means of understanding cardiovascular risk reduction, additional studies to better understand the effect of sunlight on cardiovascular risk are needed.

## **Methods**

We obtained the country latitudes used in Google's Public Data Explorer project.(17) From the World Health Organization's (WHO) Global Health Observatory,(18) we obtained country-level age-standardized estimates of: mean total cholesterol (1980-2009), mean systolic blood pressure (1975-2015), and the prevalence of raised blood pressure (1975-2015). Raised blood



pressure was defined by WHO as systolic blood pressure  $\geq 140$  mm Hg or diastolic blood pressure  $\geq 90$  mm Hg). Additional methods underlying the blood pressure measurements have been published.(19)

In addition, we obtained country-level ultraviolet B light exposure (averaged between 1997-2003) from the WHO Global Health Observatory. Some countries' names were designated differently in the Google Public Data Explorer latitudes dataset and the WHO datasets. After harmonizing the country names, we used local regression (LOESS) plots to visualize the relationship between latitude and these endpoints. The R package '*ggplot2*' and its command '*geom\_smooth*' command were used to generate the LOESS curves and corresponding 95% confidence intervals. We also calculated Spearman correlation coefficients for distance from the Equator and countries' mean cholesterol, mean systolic blood pressure, or the prevalence of raised blood pressure. We further evaluated whether our findings were stable over recent decades. Analyses were performed using R 3.4.3.(20)

## **Declaration of Interests**

The authors have no conflicts of interest.

## **Acknowledgements**

JBB is funded by the National Institutes of Health award K23HL128909. We thank computational biologist Kasper Hansen for suggesting latitude might have a relationship with blood pressure after examining a map JBB had made. We thank Edward Roccella and Brahmajee Nallamothu for their thoughtful critical review of the manuscript.

**Funding** JBB is funded by the National Institutes of Health award K23HL128909

## **Author Contributions**

Designed research: JBB

Analyzed data: YL, JBB, RDB, XL

Wrote the paper: JBB

**Figure 1.**

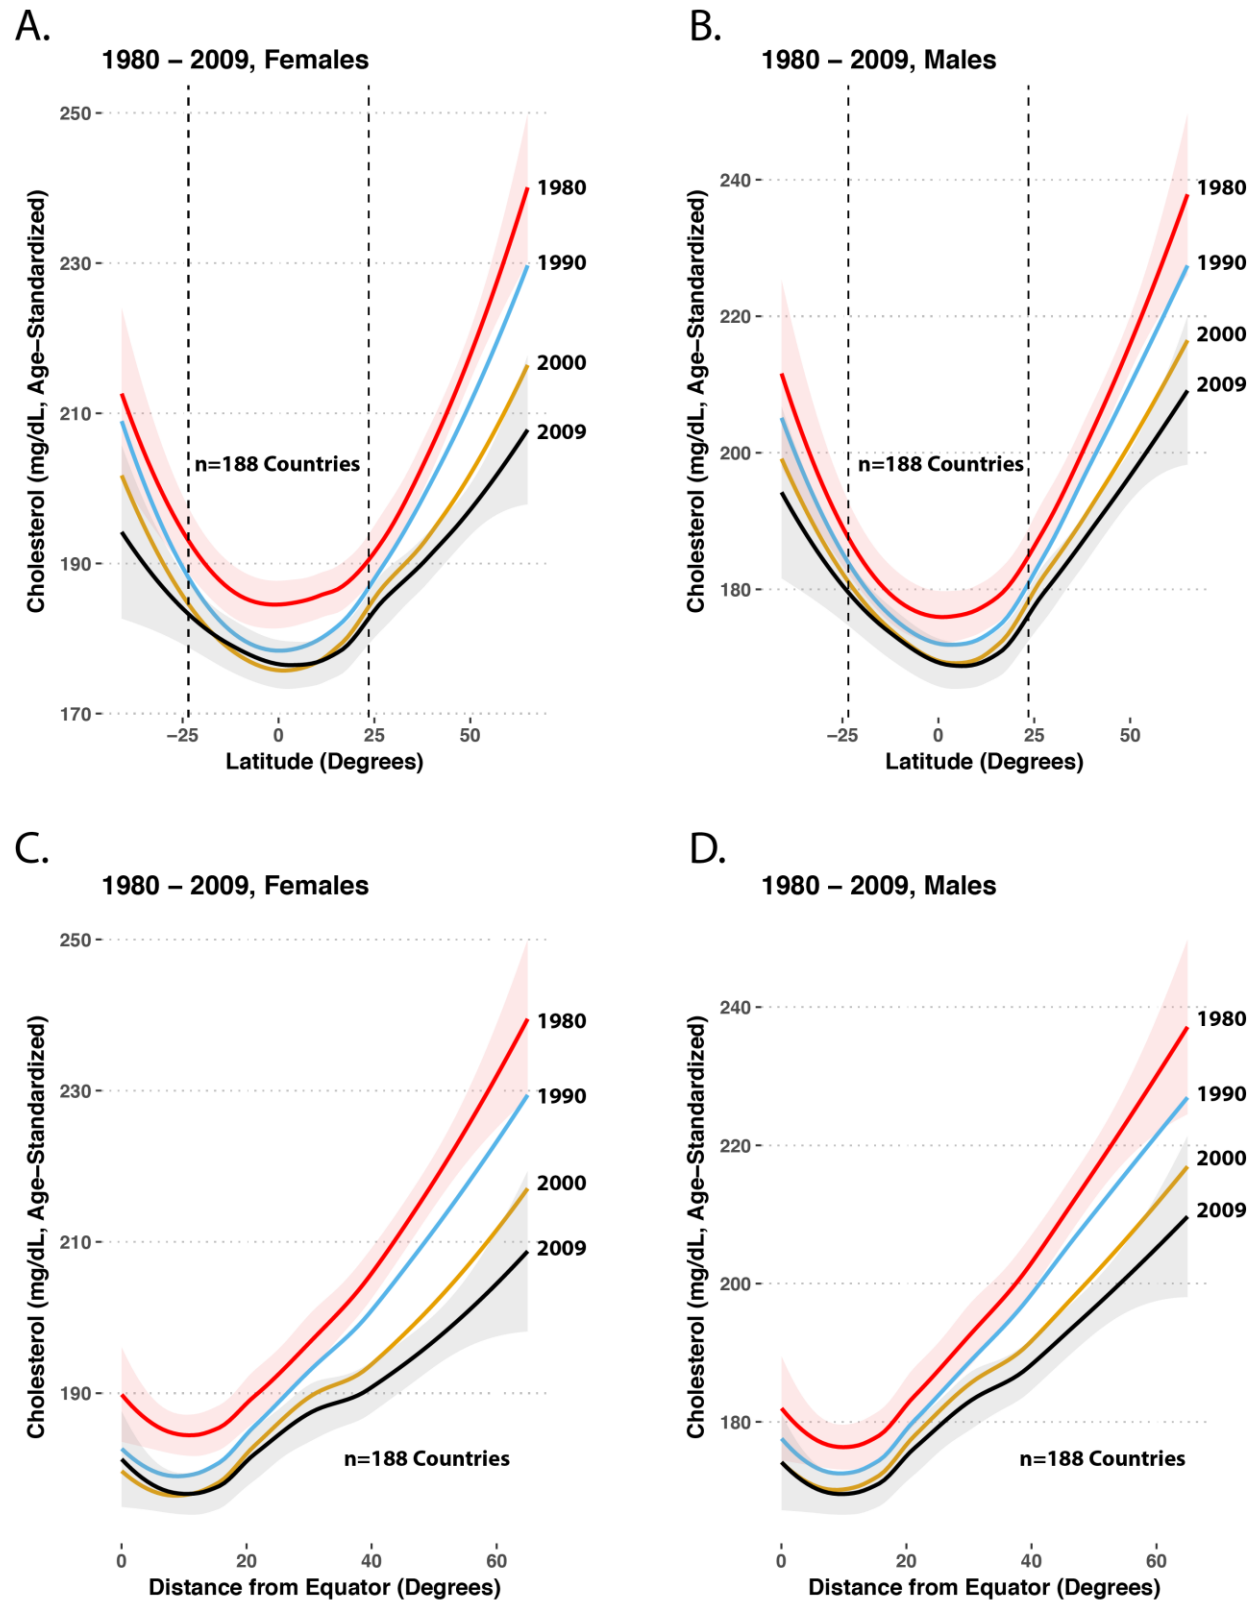

**Figure 2.**

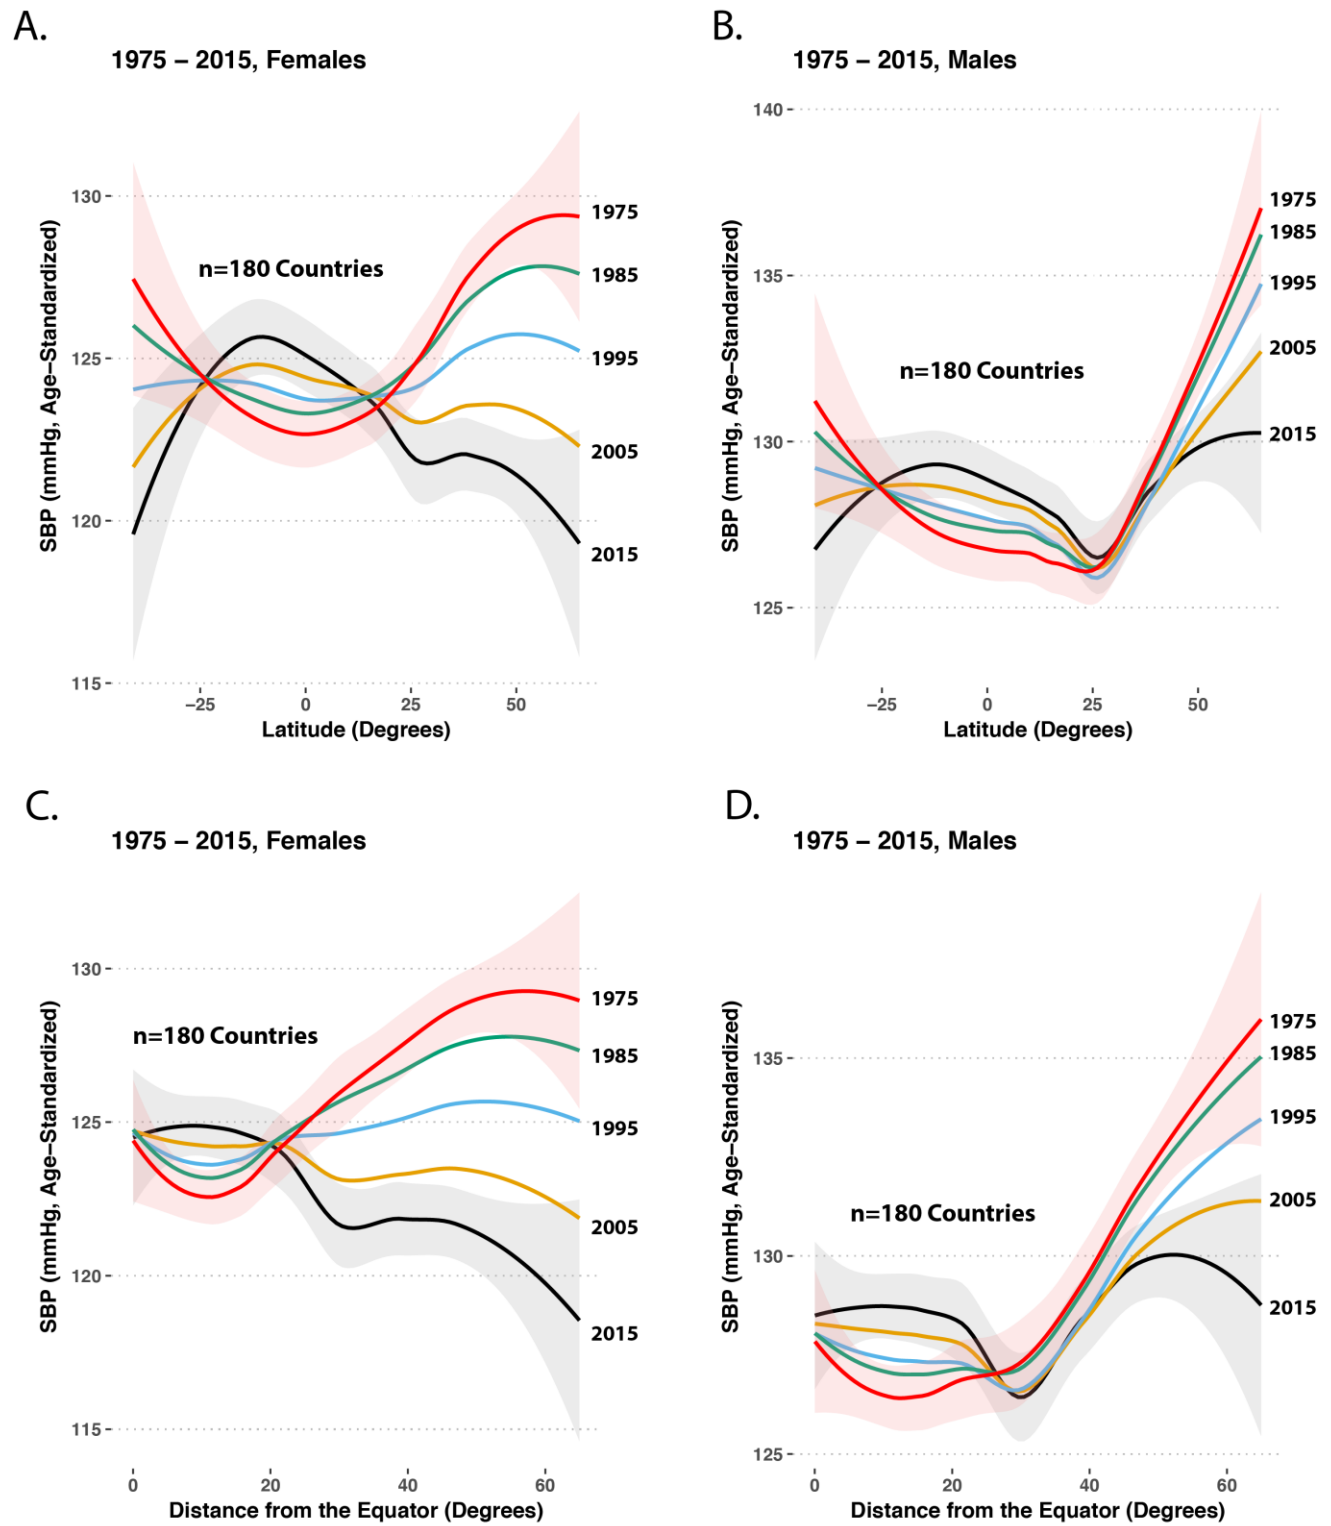

**Figure 3.**

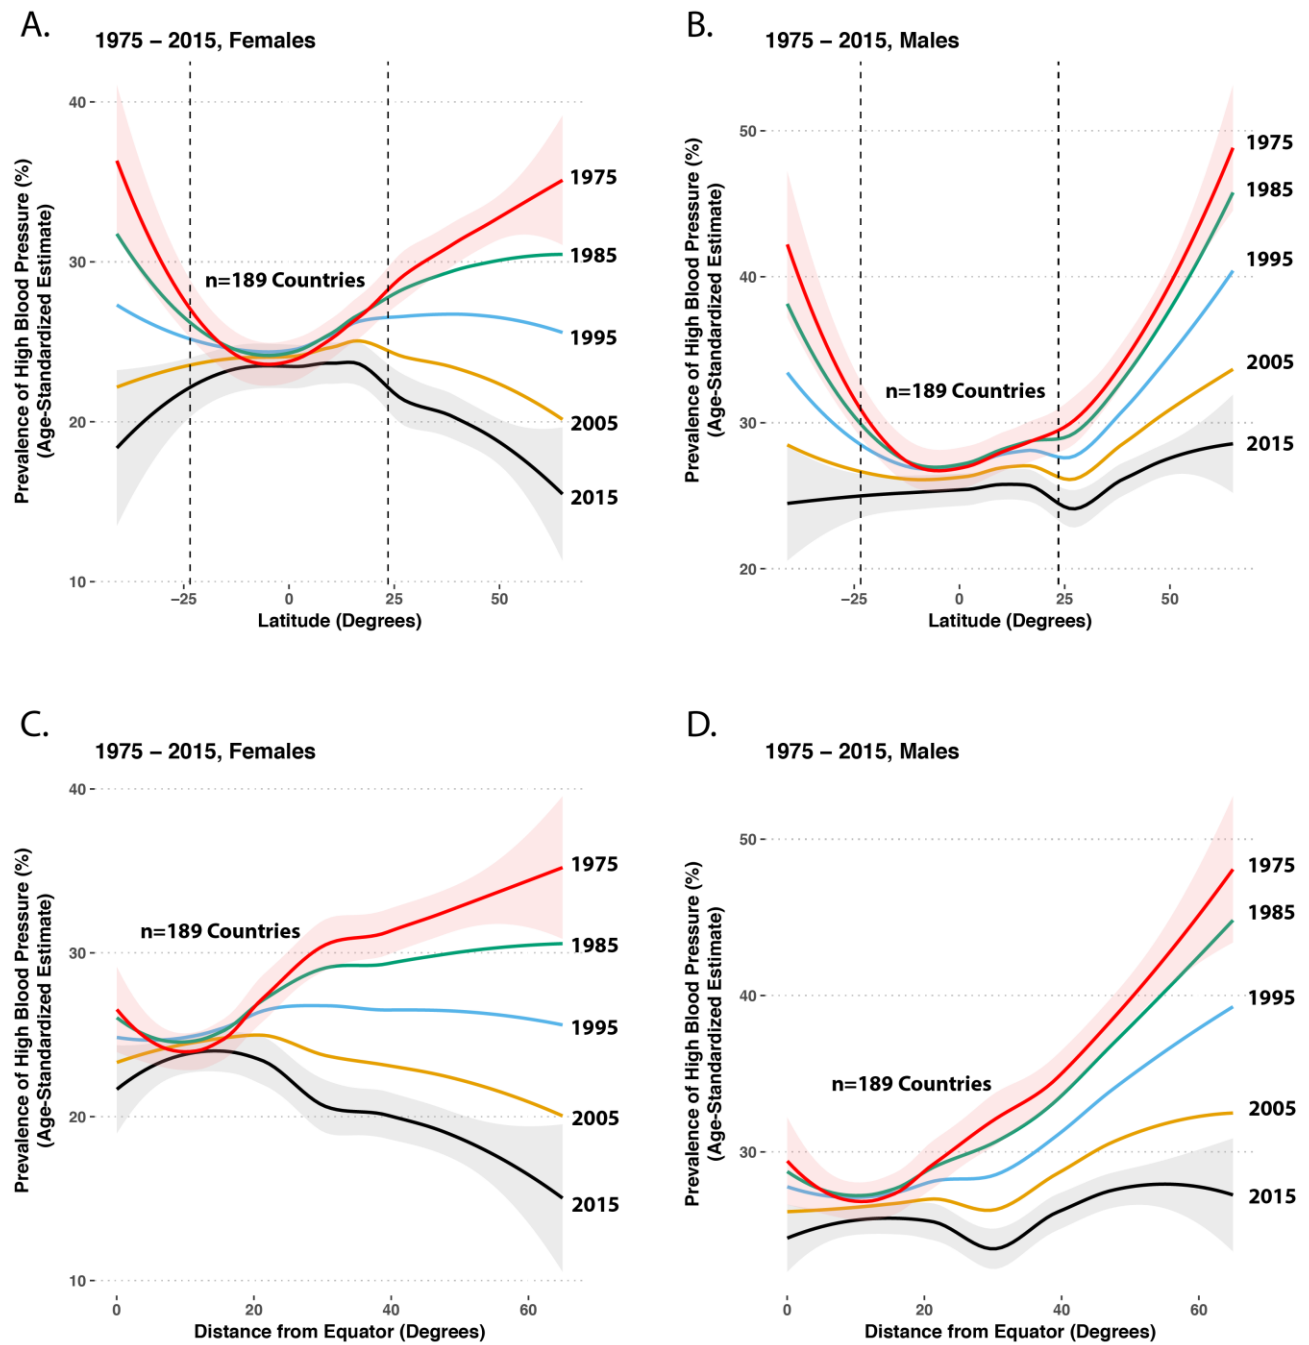

**Figure 4.**

**A.**

**1980 – 2009, Females**

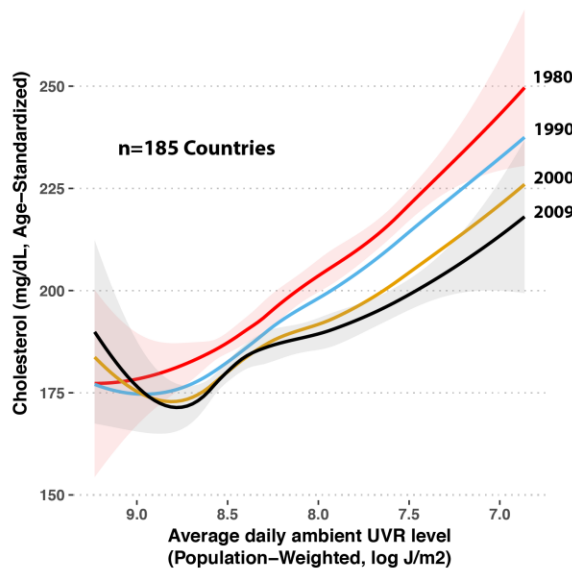

**B.**

**1980 – 2009, Males**

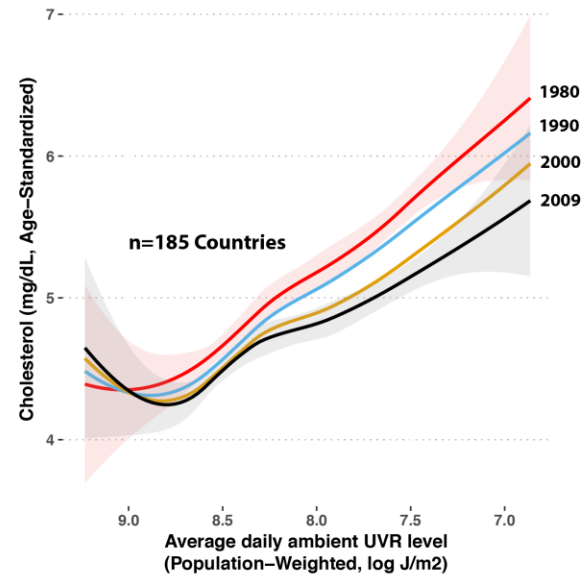

**C.**

**1975 – 2015, Females**

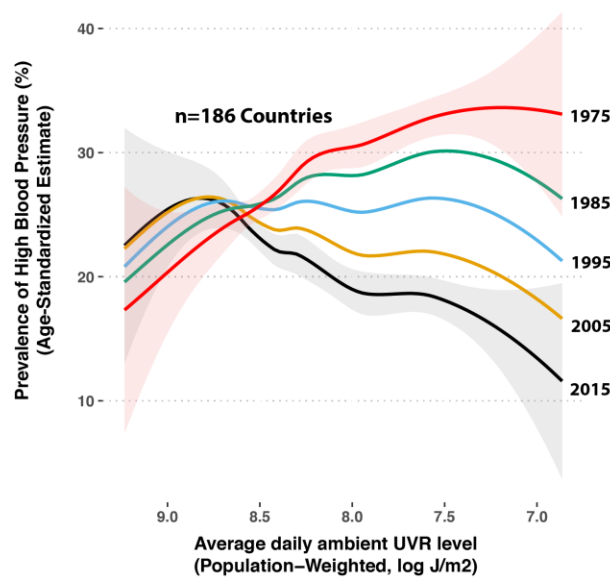

**D.**

**1975 – 2015, Males**

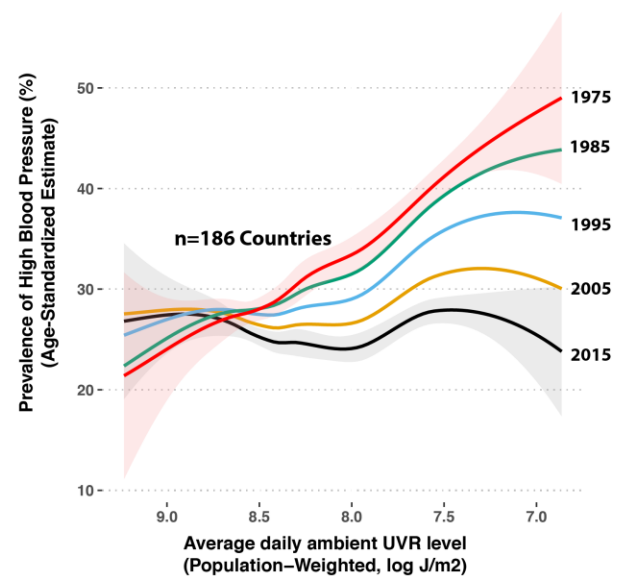

## References

1. Fleck A (1989) Latitude and ischaemic heart disease. *Lancet* 1(8638):613.
2. Grimes DS, Hindle E, & Dyer T (1996) Sunlight, cholesterol and coronary heart disease. *QJM* 89(8):579-589.
3. Rostand SG (1997) Ultraviolet light may contribute to geographic and racial blood pressure differences. *Hypertension* 30(2 Pt 1):150-156.
4. Patwardhan VG, *et al.* (2017) Randomized Control Trial Assessing Impact of Increased Sunlight Exposure versus Vitamin D Supplementation on Lipid Profile in Indian Vitamin D Deficient Men. *Indian J. Endocrinol. Metab.* 21(3):393-398.
5. Altschul R (1953) Inhibition of experimental cholesterol arteriosclerosis by ultraviolet irradiation. *N. Engl. J. Med.* 249(3):96-99.
6. Geldenhuys S, *et al.* (2014) Ultraviolet radiation suppresses obesity and symptoms of metabolic syndrome independently of vitamin D in mice fed a high-fat diet. *Diabetes* 63(11):3759-3769.
7. Prodam F, *et al.* (2016) Influence of Ultraviolet Radiation on the Association between 25-Hydroxy Vitamin D Levels and Cardiovascular Risk Factors in Obesity. *J. Pediatr.* 171:83-89.e81.
8. Feelisch M, *et al.* (2010) Is sunlight good for our heart? *Eur. Heart J.* 31(9):1041-1045.
9. Krause R, Buhning M, Hopfenmuller W, Holick MF, & Sharma AM (1998) Ultraviolet B and blood pressure. *Lancet* 352(9129):709-710.
10. Alfred BM, Lee M, & Desai ID (1974) A relationship between plasma cholesterol level, latitude, and the Rhesus blood group system. *Hum. Biol.* 46(4):641-646.
11. Cabrera SE, Mindell JS, Toledo M, Alvo M, & Ferro CJ (2016) Associations of Blood Pressure With Geographical Latitude, Solar Radiation, and Ambient Temperature:

- Results From the Chilean Health Survey, 2009-2010. *Am. J. Epidemiol.* 183(11):1071-1073.
12. Rostand SG, McClure LA, Kent ST, Judd SE, & Gutierrez OM (2016) Associations of blood pressure, sunlight, and vitamin D in community-dwelling adults. *J. Hypertens.* 34(9):1704-1710.
  13. Duranton F, *et al.* (2018) Geographical Variations in Blood Pressure Level and Seasonality in Hemodialysis Patients. *Hypertension* 71(2):289-296.
  14. Masters WA & McMillan MS (2001) Climate and Scale in Economic Growth. *Journal of Economic Growth* 6(3):167-186.
  15. Law MR, Wald NJ, & Thompson SG (1994) By how much and how quickly does reduction in serum cholesterol concentration lower risk of ischaemic heart disease? *BMJ* 308(6925):367-372.
  16. Lewington S, Clarke R, Qizilbash N, Peto R, & Collins R (2002) Age-specific relevance of usual blood pressure to vascular mortality: a meta-analysis of individual data for one million adults in 61 prospective studies. *Lancet* 360(9349):1903-1913.
  17. Google (Canonical Latitudes for Public Data Explorer Project).
  18. World Health Organization (Global Health Observatory Data Repository).
  19. Anonymous (2017) Worldwide trends in blood pressure from 1975 to 2015: a pooled analysis of 1479 population-based measurement studies with 19.1 million participants. *Lancet* 389(10064):37-55.
  20. R Core Team (2017) ( R: A language and environment for statistical computing. *R Foundation for Statistical Computing, Vienna, Austria.*



## Figure Legends.

**Figure 1.** LOESS plots of latitude or distance from the Equator and countries' mean total cholesterol (age-standardized). The top two panels show countries' latitude and the mean cholesterol in females (**Panel A**) and males (**Panel B**). The vertical dotted lines represent 23.5 degrees North and South, the Tropics of Cancer and Capricorn, which define the tropics. The lower two panels show LOESS plots of absolute distance from the Equator in degrees and countries' mean total cholesterol (age-standardized) in females (**Panel C**) and males (**Panel D**). To provide confidence intervals while maintaining visual clarity, the oldest and most recent years' LOESS curves show the 95% confidence interval in pink and grey, respectively.

**Figure 2.** LOESS plots of latitude or distance from the Equator and countries' mean systolic blood pressure (age-standardized estimate). The top two panels show mean systolic blood pressure according to latitude in females (**Panel A**) and males (**Panel B**), using data from every 10 years between 1975 and 2015. The lower two panels are LOESS plots of absolute distance from the Equator in degrees and countries' mean systolic blood pressure (age-standardized estimate) in females (**Panel C**) and males (**Panel D**), respectively. To provide confidence intervals while maintaining visual clarity, the oldest and most recent years' LOESS curves show the 95% confidence interval in pink and grey, respectively.

**Figure 3.** LOESS plots of latitude or distance from the Equator and countries' prevalence of raised blood pressure (SBP $\geq$ 140 or DBP $\geq$ 90 [age-standardized estimate]). The upper two panels show the prevalence of raised blood pressure according to latitude in females (**Panel A**) and males (**Panel B**), using data from every 10 years between 1975 and 2015. The vertical dotted lines represent 23.5 degrees North and South, the Tropics of Cancer and Capricorn, which define the tropics. The lower two panels are LOESS plots of absolute distance from the Equator in degrees and countries' prevalence of raised blood pressure in females (**Panel C**) and males (**Panel D**), respectively. To provide confidence intervals while maintaining visual clarity,

the oldest and most recent years' LOESS curves show the 95% confidence interval in pink and grey, respectively.

#### **Figure 4.**

LOESS plots of countries' log-transformed ultraviolet B radiation exposure (averaged between 1997-2003) and their populations' mean cholesterol or prevalence of raised blood pressure (SBP $\geq$ 140 or DBP $\geq$ 90 [age-standardized estimate]). The upper two panels show mean cholesterol in females (**Panel A**) and males (**Panel B**) according to ultraviolet B radiation exposure. The lower two panels show LOESS plots of the relationship between log-transformed ultraviolet B radiation exposure and prevalence of raised blood pressure in females (**Panel C**) and males (**Panel D**). To provide confidence intervals while maintaining visual clarity, the oldest and most recent years' LOESS curves show the 95% confidence interval in pink and grey, respectively.
